# Supplementary material for: Synergizing language learning: SmallTalk AI In industry 4.0 and Education 4.0
Source: PeerJ Comput Sci. 2024 Jan 31;10:e1843. doi: 10.7717/peerj-cs.1843 (PMC10909197; doi:10.7717/peerj-cs.1843)
Supplement: Supplemental Information 3 [file peerj-cs-10-1843-s003.xlsx]

## Sheet: BIU1
1	2	3	4	5
1	0	0	0	0
0	1	0	0	0
0	0	0	0	1
1	0	0	0	0
0	0	1	0	0
1	0	0	0	0
0	1	0	0	0
1	0	0	0	0
1	0	0	0	0
0	1	0	0	0
0	0	0	0	1
1	0	0	0	0
1	0	0	0	0
1	0	0	0	0
0	0	0	1	0
1	0	0	0	0
0	1	0	0	0
1	0	0	0	0
1	0	0	0	0
0	1	0	0	0
1	0	0	0	0
0	0	0	0	1
1	0	0	0	0
1	0	0	0	0
0	1	0	0	0
1	0	0	0	0
1	0	0	0	0
0	1	0	0	0
1	0	0	0	0
1	0	0	0	0
1	0	0	0	0
1	0	0	0	0
0	0	1	0	0
1	0	0	0	0
1	0	0	0	0
0	0	0	0	1
1	0	0	0	0
0	1	0	0	0
1	0	0	0	0
1	0	0	0	0
1	0	0	0	0
0	0	0	1	0
1	0	0	0	0
0	1	0	0	0
1	0	0	0	0
1	0	0	0	0
1	0	0	0	0
0	1	0	0	0
1	0	0	0	0
1	0	0	0	0
0	1	0	0	0
1	0	0	0	0
1	0	0	0	0
0	0	0	0	1
1	0	0	0	0
1	0	0	0	0
0	1	0	0	0
1	0	0	0	0
1	0	0	0	0
1	0	0	0	0
0	0	0	1	0
0	1	0	0	0
1	0	0	0	0
0	1	0	0	0
0	0	1	0	0
1	0	0	0	0
0	1	0	0	0
1	0	0	0	0
0	1	0	0	0
1	0	0	0	0
1	0	0	0	0
0	1	0	0	0
1	0	0	0	0
0	1	0	0	0
0	1	0	0	0
1	0	0	0	0
0	1	0	0	0
0	0	0	1	0
0	1	0	0	0
0	1	0	0	0
1	0	0	0	0
0		0	0	1
1	0	0	0	0
0	1	0	0	0
1	0	0	0	0
0	1	0	0	0
0	1	0	0	0
0	1	0	0	0
0	1	0	0	0
1	0	0	0	0
0	1	0	0	0
0	1	0	0	0
0	1	0	0	0
0	0	1	0	0
0	1	0	0	0
1	0	0	0	0
0	1	0	0	0
1	0	0	0	0
1	0	0	0	0
0	1	0	0	0
1	0	0	0	0
1	0	0	0	0
0	1	0	0	0
0	0	0	1	0
0	1	0	0	0
0	1	0	0	0
1	0	0	0	0
1	0	0	0	0
0	1	0	0	0
1	0	0	0	0
0	1	0	0	0
0	0	0	1	0
1	0	0	0	0
0	1	0	0	0
0	1	0	0	0
0	1	0	0	0
0	1	0	0	0
0	0	1	0	0
1	0	0	0	0
0	0	0	1	0

## Sheet: BIU2
1	2	3	4	5
0	1	0	0	0	1
1	0	0	0	0	1
1	0	0	0	0	1
1	0	0	0	0	1
0	1	0	0	0	1
0	1	0	0	0	1
1	0	0	0	0	1
1	0	0	0	0	1
1	0	0	0	0	1
1	0	0	0	0	1
0	0	0	0	1	1
1	0	0	0	0	1
1	0	0	0	0	1
1	0	0	0	0	1
0	0	0	1	0	1
1	0	0	0	0	1
0	1	0	0	0	1
1	0	0	0	0	1
1	0	0	0	0	1
0	1	0	0	0	1
1	0	0	0	0	1
0	0	0	0	1	1
1	0	0	0	0	1
1	0	0	0	0	1
0	1	0	0	0	1
1	0	0	0	0	1
1	0	0	0	0	1
0	1	0	0	0	1
1	0	0	0	0	1
1	0	0	0	0	1
1	0	0	0	0	1
1	0	0	0	0	1
1	0	0	0	0	1
1	0	0	0	0	1
1	0	0	0	0	1
0	1	0	0	0	1
1	0	0	0	0	1
0	1	0	0	0	1
1	0	0	0	0	1
1	0	0	0	0	1
1	0	0	0	0	1
0	0	0	1	0	1
1	0	0	0	0	1
0	1	0	0	0	1
1	0	0	0	0	1
1	0	0	0	0	1
1	0	0	0	0	1
0	1	0	0	0	1
1	0	0	0	0	1
1	0	0	0	0	1
0	1	0	0	0	1
1	0	0	0	0	1
1	0	0	0	0	1
0	0	0	0	1	1
1	0	0	0	0	1
1	0	0	0	0	1
0	1	0	0	0	1
1	0	0	0	0	1
1	0	0	0	0	1
1	0	0	0	0	1
0	0	0	1	0	1
0	1	0	0	0	1
1	0	0	0	0	1
0	1	0	0	0	1
0	0	1	0	0	1
1	0	0	0	0	1
0	1	0	0	0	1
1	0	0	0	0	1
0	1	0	0	0	1
1	0	0	0	0	1
1	0	0	0	0	1
0	1	0	0	0	1
1	0	0	0	0	1
0	1	0	0	0	1
0	1	0	0	0	1
1	0	0	0	0	1
0	1	0	0	0	1
0	0	0	1	0	1
0	1	0	0	0	1
0	1	0	0	0	1
1	0	0	0	0	1
0		0	0	1	1
1	0	0	0	0	1
0	1	0	0	0	1
1	0	0	0	0	1
0	1	0	0	0	1
0	1	0	0	0	1
0	1	0	0	0	1
0	1	0	0	0	1
1	0	0	0	0	1
0	1	0	0	0	1
0	1	0	0	0	1
0	1	0	0	0	1
1	0	0	0	0	1
0	1	0	0	0	1
1	0	0	0	0	1
0	1	0	0	0	1
1	0	0	0	0	1
1	0	0	0	0	1
0	1	0	0	0	1
1	0	0	0	0	1
1	0	0	0	0	1
0	1	0	0	0	1
1	0	0	0	0	1
0	1	0	0	0	1
0	1	0	0	0	1
1	0	0	0	0	1
1	0	0	0	0	1
0	1	0	0	0	1
1	0	0	0	0	1
0	1	0	0	0	1
0	0	0	1	0	1
1	0	0	0	0	1
0	1	0	0	0	1
0	1	0	0	0	1
0	1	0	0	0	1
0	1	0	0	0	1
0	0	1	0	0	1
1	0	0	0	0	1
0	0	0	1	0	1

## Sheet: BIU3
1	2	3	4	5
1	0	0	0	0
1	0	0	0	0
0	0	0	0	1
1	0	0	0	0
0	1	0	0	0
0	0	1	0	0
1	0	0	0	0
0	0	0	1	0
1	0	0	0	0
1	0	0	0	0
0	1	0	0	0
1	0	0	0	0
0	1	0	0	0
1	0	0	0	0
1	0	0	0	0
0	1	0	0	0
0	0	1	0	0
1	0	0	0	0
0	0	0	1	0
1	0	0	0	0
1	0	0	0	0
0	1	0	0	0
0	1	0	0	0
0	0	0	0	1
1	0	0	0	0
1	0	0	0	0
0	1	0	0	0
0	0	1	0	0
1	0	0	0	0
1	0	0	0	0
0	1	0	0	0
0	1	0	0	0
1	0	0	0	0
1	0	0	0	0
0	1	0	0	0
0	1	0	0	0
0	1	0	0	0
1	0	0	0	0
1	0	0	0	0
0	0	0	1	0
1	0	0	0	0
1	0	0	0	0
0	0	1	0	0
1	0	0	0	0
1	0	0	0	0
1	0	0	0	0
0	0	0	0	1
1	0	0	0	0
1	0	0	0	0
1	0	0	0	0
1	0	0	0	0
0	0	1	0	0
1	0	0	0	0
1	0	0	0	0
0	1	0	0	0
1	0	0	0	0
1	0	0	0	0
1	0	0	0	0
0	1	0	0	0
0	0	1	0	0
1	0	0	0	0
0	1	0	0	0
0	1	0	0	0
1	0	0	0	0
1	0	0	0	0
0	1	0	0	0
0	1	0	0	0
0	0	0	0	1
0	1	0	0	0
1	0	0	0	0
1	0	0	0	0
0	1	0	0	0
0	1	0	0	0
0	1	0	0	0
1	0	0	0	0
0	1	0	0	0
1	0	0	0	0
1	0	0	0	0
1	0	0	0	0
0	1	0	0	0
0	0	1	0	0
0	1	0	0	0
1	0	0	0	0
1	0	0	0	0
0	1	0	0	0
1	0	0	0	0
1	0	0	0	0
0	1	0	0	0
1	0	0	0	0
0	0	0	0	1
1	0	0	0	0
0	0	0	1	0
1	0	0	0	0
0	1	0	0	0
1	0	0	0	0
0	0	1	0	0
1	0	0	0	0
0	1	0	0	0
1	0	0	0	0
0	1	0	0	0
0	0	0	0	1
1	0	0	0	0
1	0	0	0	0
0	1	0	0	0
0	1	0	0	0
1	0	0	0	0
0	1	0	0	0
1	0	0	0	0
0	0	0	0	1
1	0	0	0	0
0	1	0	0	0
1	0	0	0	0
1	0	0	0	0
0	1	0	0	0
0	1	0	0	0
1	0	0	0	0
0	0	0	0	1
0	1	0	0	0
0	1	0	0	0
0	0	0	0	1

## Sheet: BIU4
1	2	3	4	5
0	1	0	0	0	1
0	1	0	0	0	1
1	0	0	0	0	1
0	0	0	1	0	1
1	0	0	0	0	1
0	1	0	0	0	1
1	0	0	0	0	1
0	1	0	0	0	1
0	0	0	0	1	1
0	1	0	0	0	1
0	1	0	0	0	1
1	0	0	0	0	1
0	1	0	0	0	1
1	0	0	0	0	1
0	1	0	0	0	1
1	0	0	0	0	1
0	1	0	0	0	1
1	0	0	0	0	1
0	1	0	0	0	1
1	0	0	0	0	1
0	1	0	0	0	1
1	0	0	0	0	1
0	1	0	0	0	1
1	0	0	0	0	1
0	0	0	1	0	1
1	0	0	0	0	1
0	1	0	0	0	1
0	1	0	0	0	1
1	0	0	0	0	1
0	1	0	0	0	1
1	0	0	0	0	1
1	0	0	0	0	1
0	1	0	0	0	1
0	1	0	0	0	1
1	0	0	0	0	1
0	1	0	0	0	1
1	0	0	0	0	1
0	0	0	0	1	1
1	0	0	0	0	1
1	0	0	0	0	1
0	1	0	0	0	1
0	1	0	0	0	1
1	0	0	0	0	1
0	1	0	0	0	1
1	0	0	0	0	1
1	0	0	0	0	1
1	0	0	0	0	1
1	0	0	0	0	1
0	1	0	0	0	1
1	0	0	0	0	1
1	0	0	0	0	1
1	0	0	0	0	1
1	0	0	0	0	1
0	0	0	1	0	1
1	0	0	0	0	1
0	1	0	0	0	1
1	0	0	0	0	1
0	1	0	0	0	1
1	0	0	0	0	1
0	1	0	0	0	1
1	0	0	0	0	1
1	0	0	0	0	1
1	0	0	0	0	1
0	0	0	0	1	1
0	1	0	0	0	1
0	1	0	0	0	1
1	0	0	0	0	1
0	1	0	0	0	1
1	0	0	0	0	1
0	0	0	1	0	1
1	0	0	0	0	1
0	1	0	0	0	1
0	1	0	0	0	1
1	0	0	0	0	1
0	1	0	0	0	1
0	1	0	0	0	1
1	0	0	0	0	1
0	1	0	0	0	1
0	1	0	0	0	1
0	1	0	0	0	1
0	1	0	0	0	1
1	0	0	0	0	1
0	1	0	0	0	1
1	0	0	0	0	1
0	1	0	0	0	1
0	0	1	0	0	1
1	0	0	0	0	1
0	1	0	0	0	1
1	0	0	0	0	1
1	0	0	0	0	1
0	1	0	0	0	1
0	0	0	1	0	1
1	0	0	0	0	1
1	0	0	0	0	1
0	1	0	0	0	1
1	0	0	0	0	1
0	1	0	0	0	1
0	0	1	0	0	1
1	0	0	0	0	1
0	1	0	0	0	1
1	0	0	0	0	1
0	0	1	0	0	1
1	0	0	0	0	1
1	0	0	0	0	1
0	1	0	0	0	1
0	0	0	1	0	1
0	0	0	0	1	1
0	0	1	0	0	1
1	0	0	0	0	1
0	1	0	0	0	1
0	0	1	0	0	1
1	0	0	0	0	1
1	0	0	0	0	1
0	0	1	0	0	1
1	0	0	0	0	1
0	1	0	0	0	1
1	0	0	0	0	1
0	0	0	1	0	1
1	0	0	0	0	1
0	1	0	0	0	1

## Sheet: BIU5
1	2	3	4	5
0	0	0	1	0
0	1	0	0	0
1	0	0	0	0
0	0	1	0	0
1	0	0	0	0
0	1	0	0	0
1	0	0	0	0
0	1	0	0	0
1	0	0	0	0
1	0	0	0	0
0	1	0	0	0
0	0	0	0	1
1	0	0	0	0
1	0	0	0	0
1	0	0	0	0
0	0	0	1	0
1	0	0	0	0
0	1	0	0	0
0	1	0	0	0
1	0	0	0	0
0	1	0	0	0
1	0	0	0	0
1	0	0	0	0
0	1	0	0	0
0	0	0	0	1
1	0	0	0	0
1	0	0	0	0
0	1	0	0	0
0	0	1	0	0
1	0	0	0	0
1	0	0	0	0
1	0	0	0	0
0	1	0	0	0
1	0	0	0	0
1	0	0	0	0
0	1	0	0	0
1	0	0	0	0
0	0	0	1	0
1	0	0	0	0
1	0	0	0	0
1	0	0	0	0
0	1	0	0	0
1	0	0	0	0
1	0	0	0	0
1	0	0	0	0
0	0	0	0	1
1	0	0	0	0
0	1	0	0	0
1	0	0	0	0
0	1	0	0	0
1	0	0	0	0
0	1	0	0	0
1	0	0	0	0
0	1	0	0	0
0	0	1	0	0
0	1	0	0	0
1	0	0	0	0
0	1	0	0	0
0	1	0	0	0
1	0	0	0	0
0	1	0	0	0
1	0	0	0	0
0	1	0	0	0
0	0	0	1	0
0	1	0	0	0
1	0	0	0	0
1	0	0	0	0
0	1	0	0	0
0	1	0	0	0
1	0	0	0	0
0	1	0	0	0
0	1	0	0	0
1	0	0	0	0
1	0	0	0	0
1	0	0	0	0
0	1	0	0	0
1	0	0	0	0
1	0	0	0	0
0	0	1	0	0
1	0	0	0	0
0	1	0	0	0
1	0	0	0	0
0	1	0	0	0
0	1	0	0	0
0	1	0	0	0
0	1	0	0	0
1	0	0	0	0
1	0	0	0	0
1	0	0	0	0
0	1	0	0	0
1	0	0	0	0
1	0	0	0	0
0	0	0	0	1
1	0	0	0	0
0	0	0	1	0
1	0	0	0	0
1	0	0	0	0
1	0	0	0	0
0	1	0	0	0
1	0	0	0	0
1	0	0	0	0
1	0	0	0	0
0	1	0	0	0
1	0	0	0	0
0	1	0	0	0
1	0	0	0	0
0	1	0	0	0
1	0	0	0	0
0	0	1	0	0
1	0	0	0	0
0	1	0	0	0
1	0	0	0	0
0	1	0	0	0
1	0	0	0	0
1	0	0	0	0
0	1	0	0	0
0	1	0	0	0
0	1	0	0	0
1	0	0	0	0
1	0	0	0	0

## Sheet: BIU6
1	2	3	4	5
1	0	0	0	0	1
1	0	0	0	0	1
1	0	0	0	0	1
0	1	0	0	0	1
1	0	0	0	0	1
1	0	0	0	0	1
0	0	0	0	1	1
0	1	0	0	0	1
1	0	0	0	0	1
1	0	0	0	0	1
1	0	0	0	0	1
0	1	0	0	0	1
1	0	0	0	0	1
1	0	0	0	0	1
1	0	0	0	0	1
0	1	0	0	0	1
0	0	1	0	0	1
1	0	0	0	0	1
1	0	0	0	0	1
1	0	0	0	0	1
0	1	0	0	0	1
1	0	0	0	0	1
0	0	0	0	1	1
0	1	0	0	0	1
1	0	0	0	0	1
1	0	0	0	0	1
1	0	0	0	0	1
0	1	0	0	0	1
0	0	1	0	0	1
1	0	0	0	0	1
1	0	0	0	0	1
1	0	0	0	0	1
0	1	0	0	0	1
1	0	0	0	0	1
1	0	0	0	0	1
0	1	0	0	0	1
1	0	0	0	0	1
0	1	0	0	0	1
1	0	0	0	0	1
1	0	0	0	0	1
1	0	0	0	0	1
1	0	0	0	0	1
0	0	0	0	1	1
1	0	0	0	0	1
1	0	0	0	0	1
0	1	0	0	0	1
1	0	0	0	0	1
0	1	0	0	0	1
1	0	0	0	0	1
0	1	0	0	0	1
1	0	0	0	0	1
0	1	0	0	0	1
1	0	0	0	0	1
0	1	0	0	0	1
0	1	0	0	0	1
0	1	0	0	0	1
1	0	0	0	0	1
0	1	0	0	0	1
0	1	0	0	0	1
1	0	0	0	0	1
0	1	0	0	0	1
0	0	0	0	1	1
0	1	0	0	0	1
0	1	0	0	0	1
0	1	0	0	0	1
1	0	0	0	0	1
1	0	0	0	0	1
0	1	0	0	0	1
0	1	0	0	0	1
1	0	0	0	0	1
0	1	0	0	0	1
0	1	0	0	0	1
1	0	0	0	0	1
1	0	0	0	0	1
1	0	0	0	0	1
0	1	0	0	0	1
1	0	0	0	0	1
1	0	0	0	0	1
0	1	0	0	0	1
1	0	0	0	0	1
0	1	0	0	0	1
0	0	0	0	1	1
0	1	0	0	0	1
0	1	0	0	0	1
0	1	0	0	0	1
0	1	0	0	0	1
1	0	0	0	0	1
1	0	0	0	0	1
1	0	0	0	0	1
0	1	0	0	0	1
1	0	0	0	0	1
1	0	0	0	0	1
0	1	0	0	0	1
1	0	0	0	0	1
0	1	0	0	0	1
1	0	0	0	0	1
1	0	0	0	0	1
1	0	0	0	0	1
0	1	0	0	0	1
1	0	0	0	0	1
1	0	0	0	0	1
1	0	0	0	0	1
0	0	0	1	0	1
1	0	0	0	0	1
0	1	0	0	0	1
1	0	0	0	0	1
1	0	0	0	0	1
1	0	0	0	0	1
0	1	0	0	0	1
1	0	0	0	0	1
0	1	0	0	0	1
1	0	0	0	0	1
1	0	0	0	0	1
1	0	0	0	0	1
1	0	0	0	0	1
0	0	0	0	1	1
1	0	0	0	0	1
0	1	0	0	0	1
1	0	0	0	0	1
0	0	0	1	0	1
